# Supplementary material for: Population Traits and a Female Perspective forAglaeandExaerete, Tropical Bee Parasites (Hymenoptera, Apinae: Euglossini)
Source: Hindawi journal article supplement (doi:10.1155/2019/4602785), 2019-05-02
Supplement: f1 [file 4602785.f1.zip]

Archive with 3 entries (3 files):
- mat.4602785.v2.pdf
- Supplemental_2_PSYCHE_2735464.pdf
- Supplimental Figure 1_PSYCHE_2735463.jpg
