# Supplementary figures and images for: Population Traits and a Female Perspective forAglaeandExaerete, Tropical Bee Parasites (Hymenoptera, Apinae: Euglossini)
Source: Hindawi journal article supplement (doi:10.1155/2019/4602785), 2019-05-02

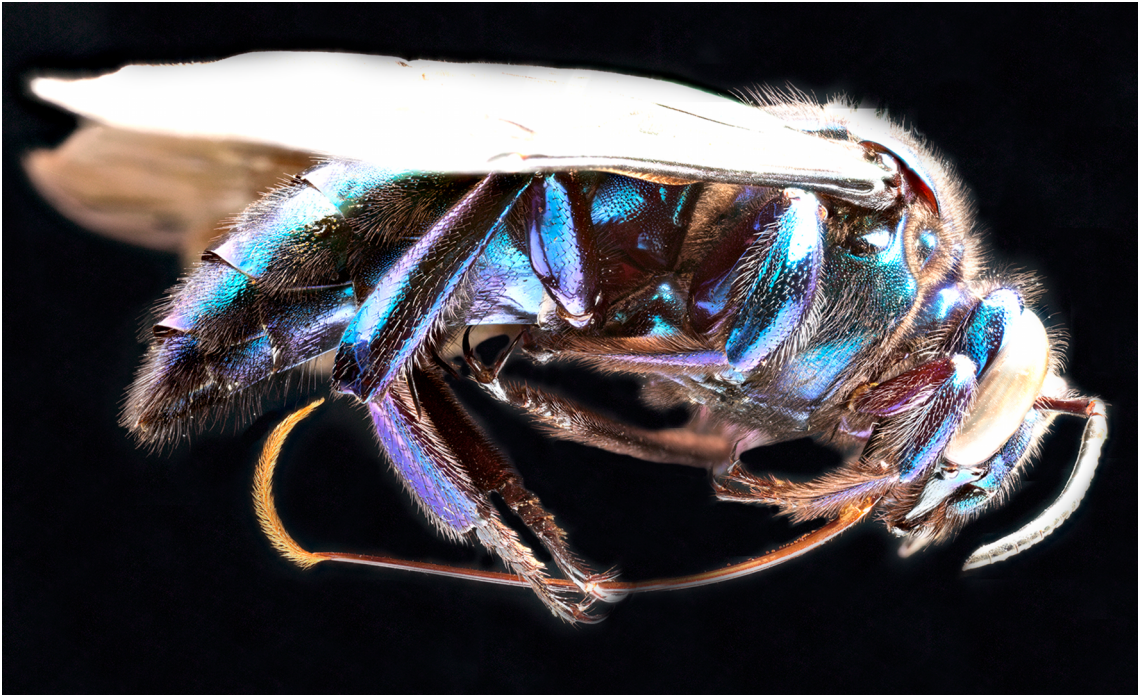

Supplement: f1 [file 4602785.f1.zip]

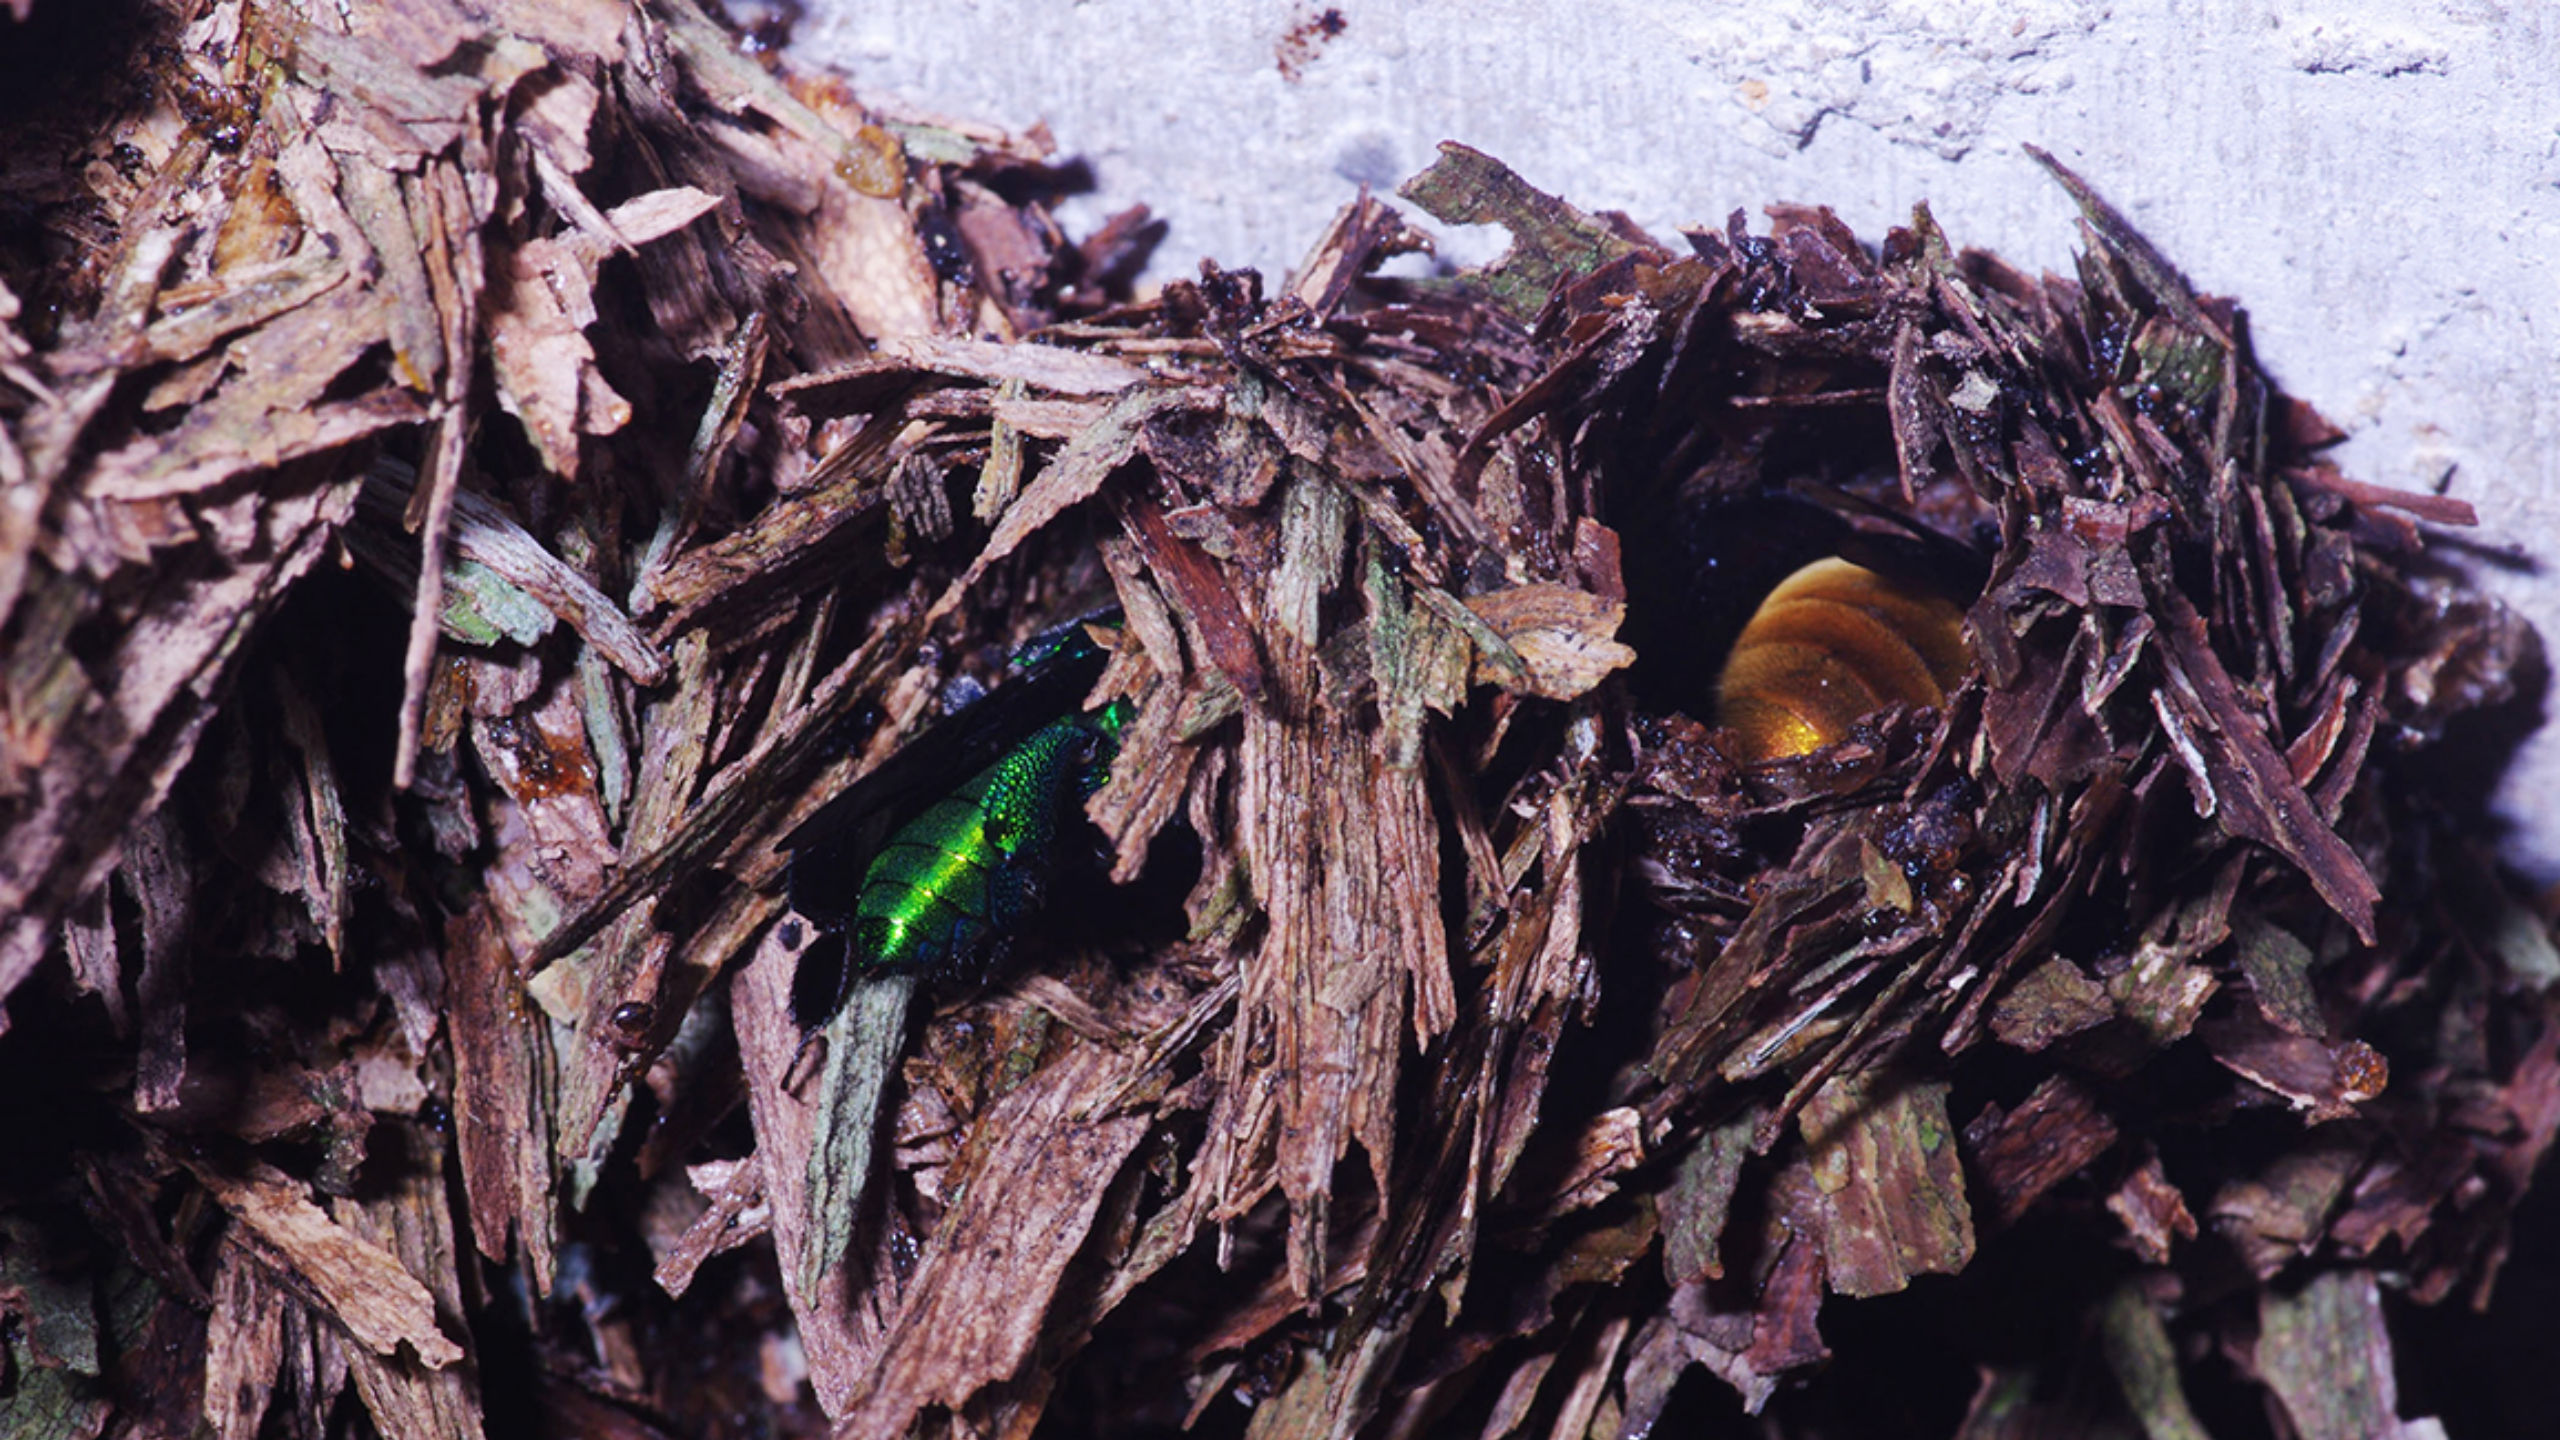



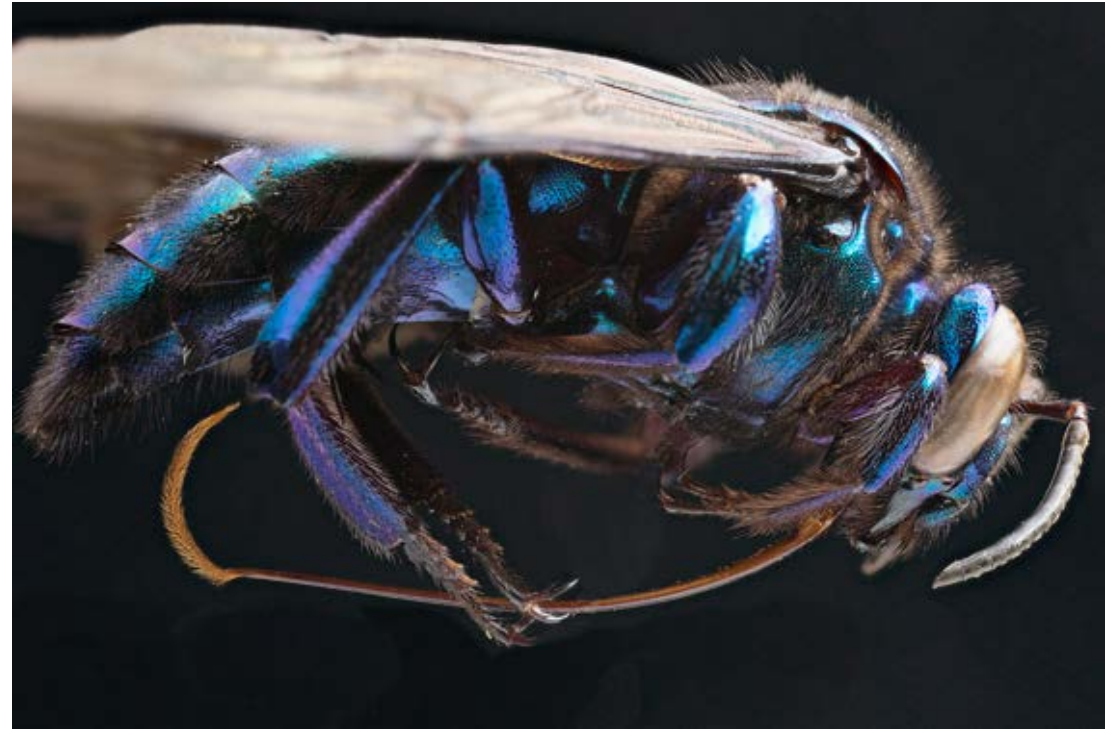

Supplement: f1 [file 4602785.f1.zip]

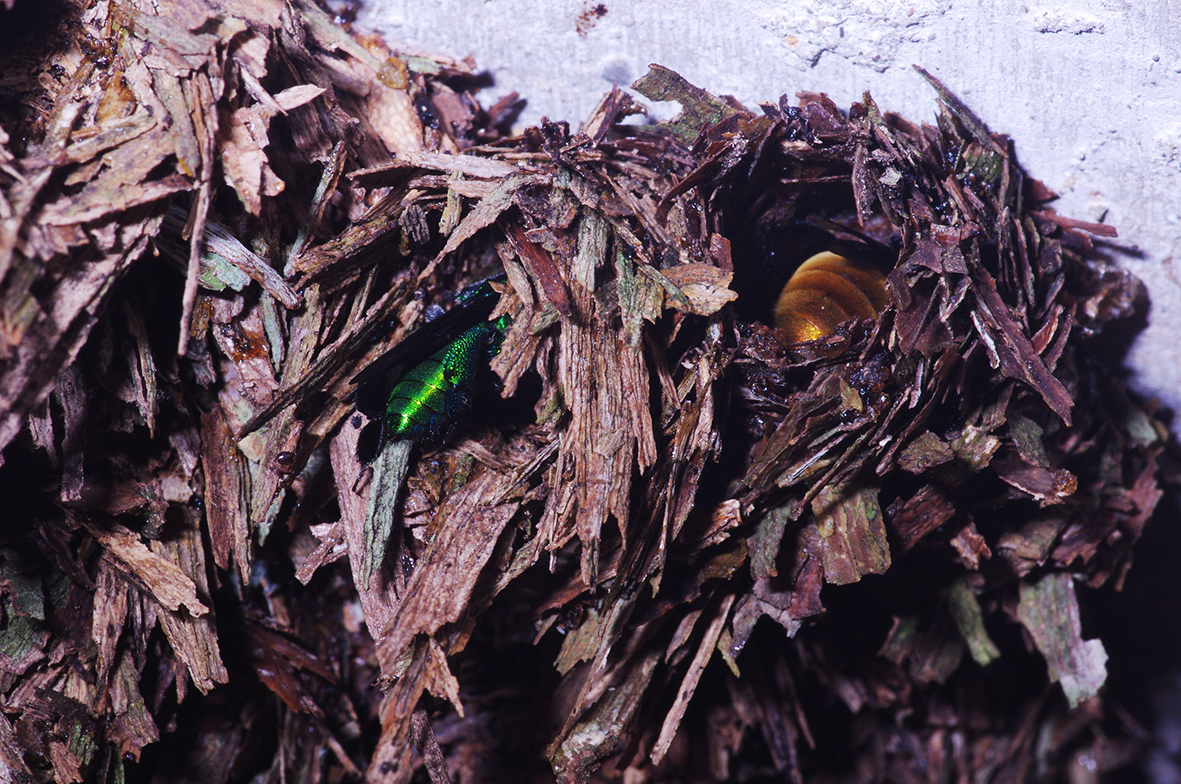

Supplement: f1 [file 4602785.f1.zip › Supplimental Figure 1_PSYCHE_2735463.jpg]
